# Supplementary material
Source: Springer Nature journal article supplement (https://www.springermedizin.de/resource/supplementary/13058_2004_1024_MOESM2_ESM.pdf/9698166)

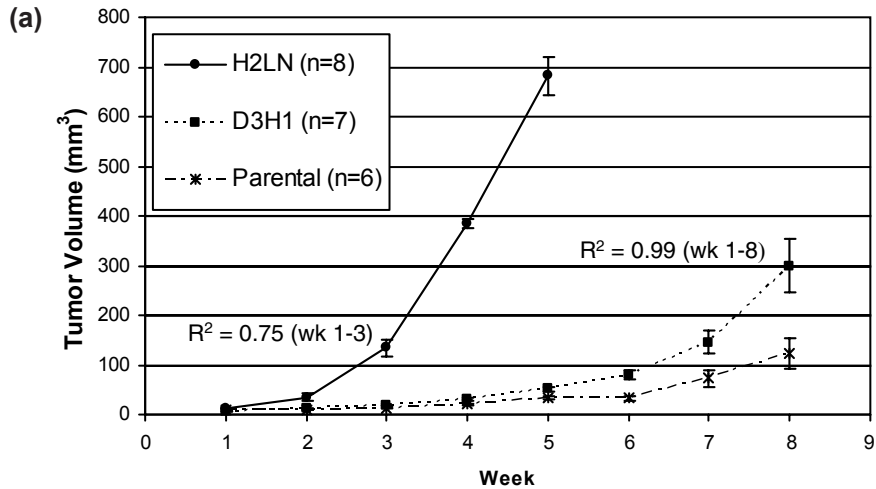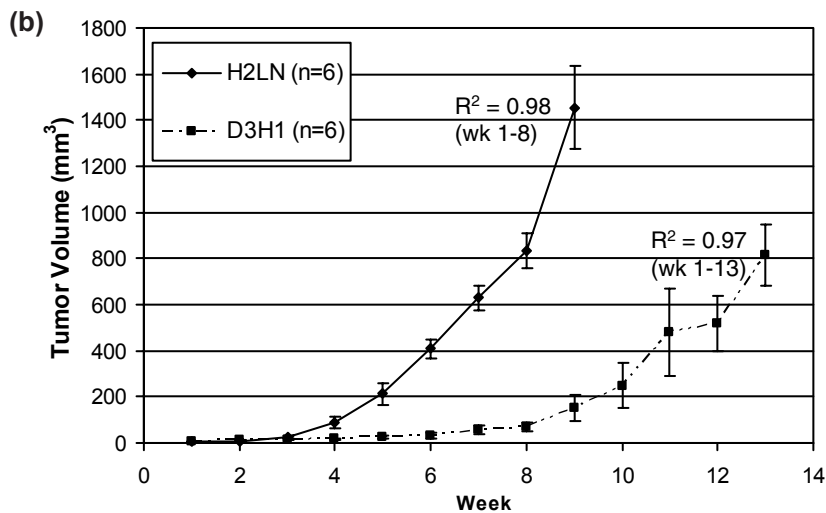

Supplement: MOESM2 [file 9698166]
